# Supplementary material for: Investigating the Antigen Specificity of Multiple Sclerosis Central Nervous System-Derived Immunoglobulins
Source: PubMed Central journal article supplement (PMC4663633; doi:10.3389/fimmu.2015.00600), 2015-11-25

**Supplementary Figure 1. MS and control-derived rIgG binding to CNS cells and MOG-transfected cells detected with a cell-based assay.** Binding to extracellular antigens present on the surface of the CNS-derived cell lines, human oligodendrogloma cell line (HOG), a human neuroblastoma cell line (SKNSH) or to a control non-CNS cell line (293T) is shown in the 1<sup>st</sup>, 2<sup>nd</sup> and 3<sup>rd</sup> columns respectively. Binding to Jurkat cells transfected with MOG-GFP or GFP alone is shown in the 4<sup>th</sup> and 5<sup>th</sup> columns respectively. Antibody binding was detected using anti-human secondary antibodies and is shown with blue histograms. Background binding observed with secondary antibody alone is shown in red.

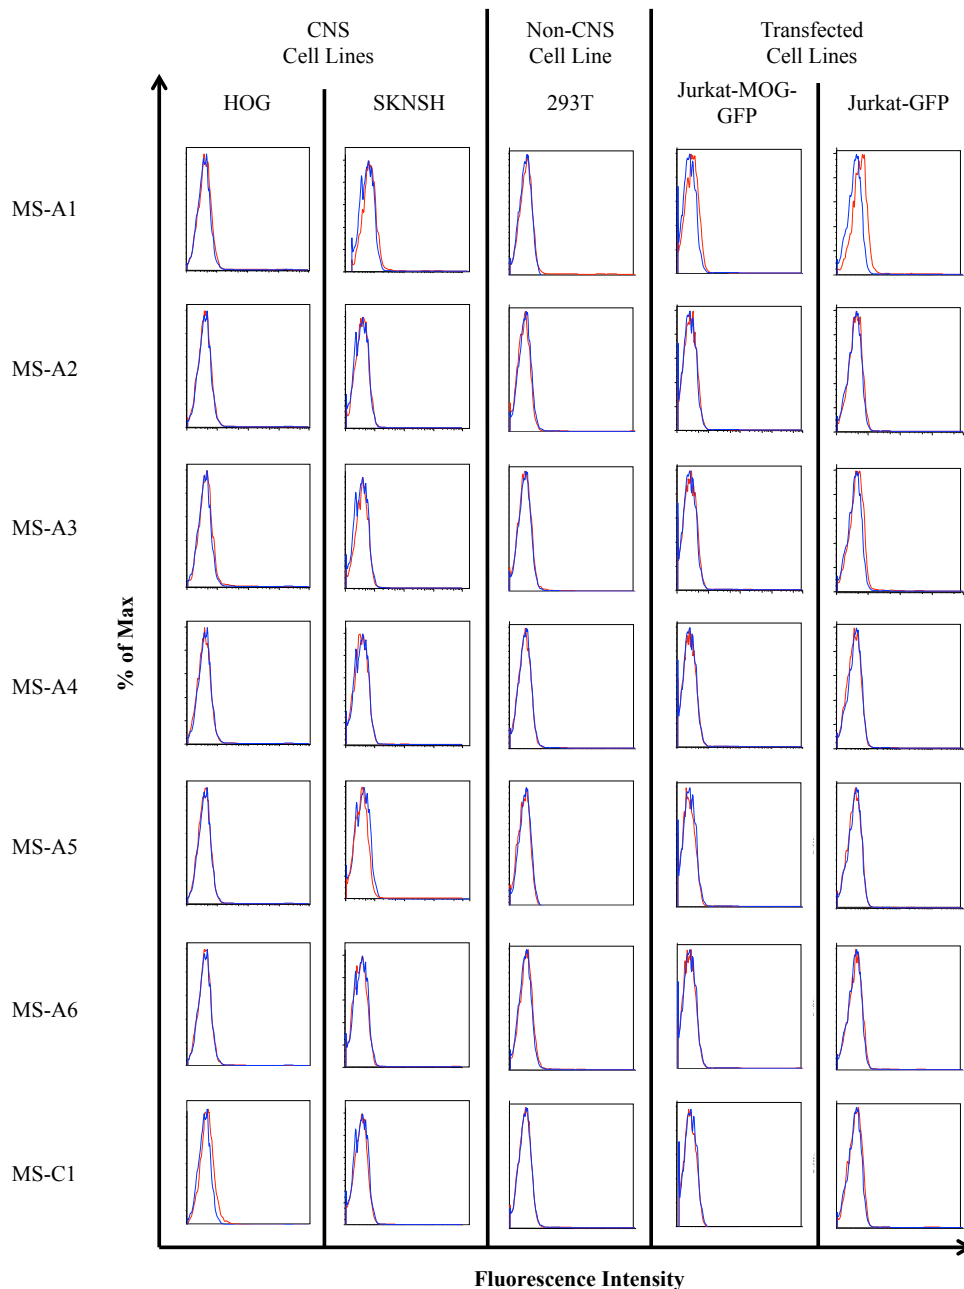

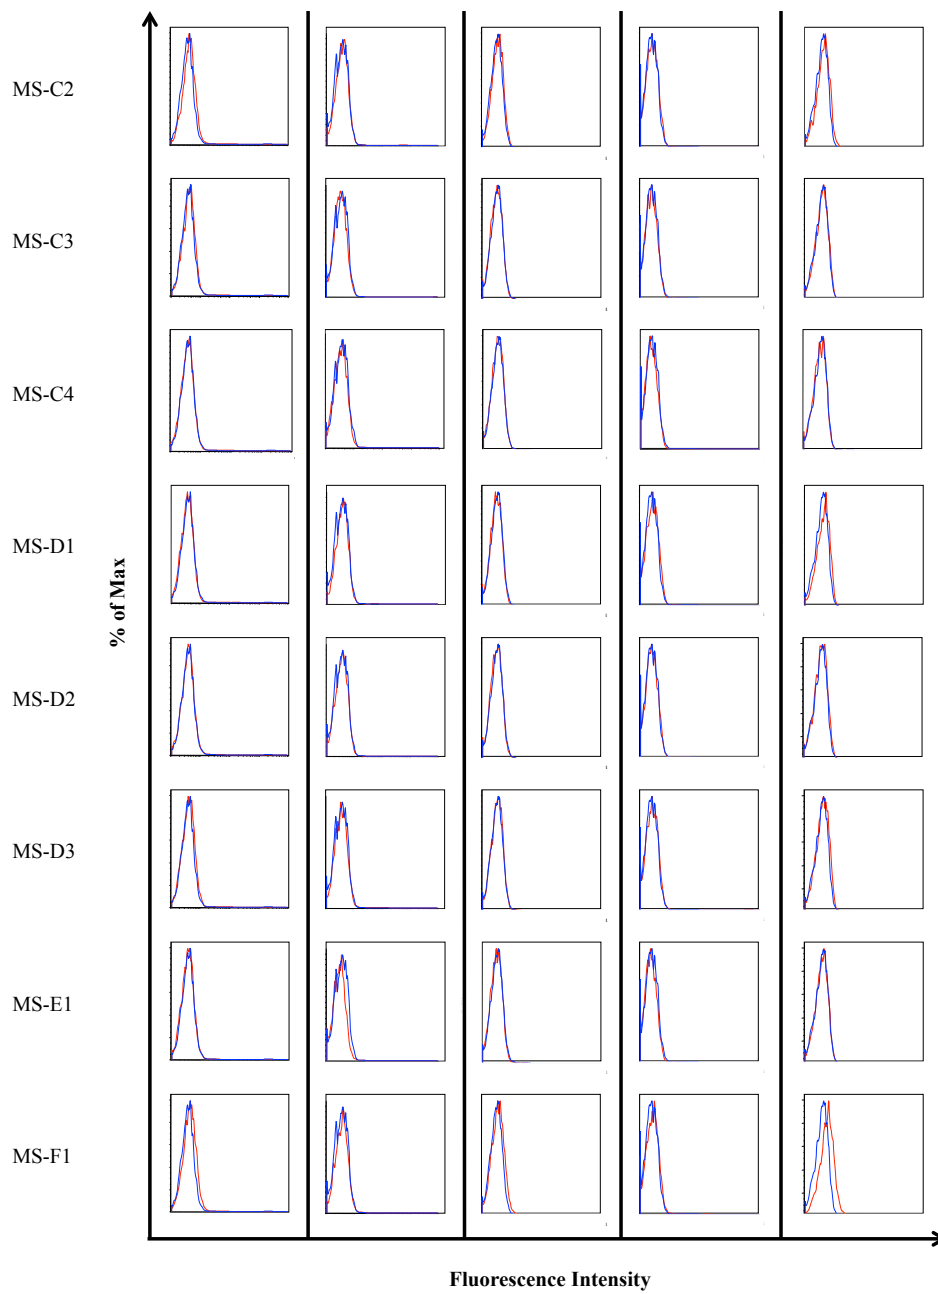

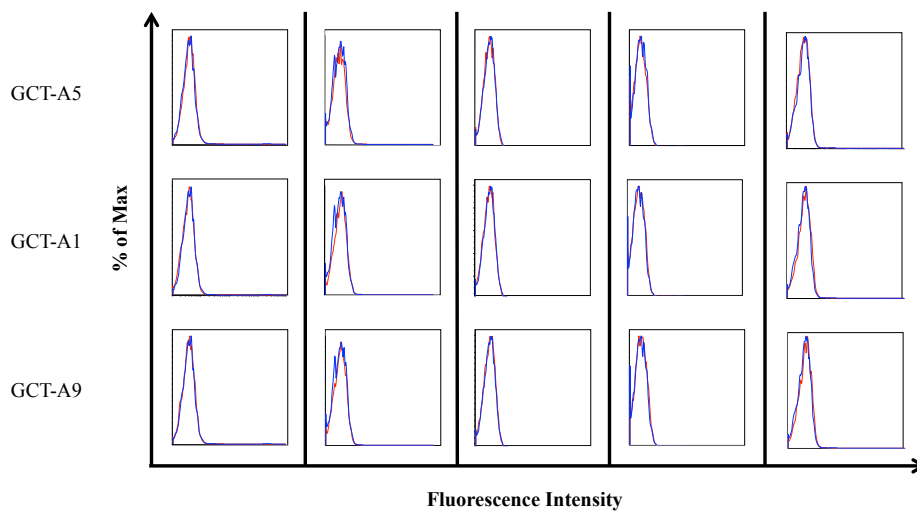

Supplement: image_1.pdf [file image_1.pdf]
