# Supplementary material for: Investigating the Antigen Specificity of Multiple Sclerosis Central Nervous System-Derived Immunoglobulins
Source: PubMed Central journal article supplement (PMC4663633; doi:10.3389/fimmu.2015.00600), 2015-11-25
Supplement: image_2.pdf [file image_2.pdf]

**Supplementary Figure 2. ProtoArray-derived data show targets recognized by rIgG derived from B cells residing in the CNS of patients with multiple sclerosis.** Reactivity of MS derived rIgG was compared to that of rIgG derived from controls. Z-scores that were larger than 3 in the MS cohort and did not reach this threshold in any of the control arrays are shown and highlighted in red. The rIgGs from both the MS and controls groups were pooled (up to 3 rIgG per array) during the initial scouting to maximize efficient use of the arrays. MS array 1 included MS-A1, A4 and A6; MS array 2 included MS-C1, C2 and C4; MS array 3 included MS-F1, MS-B1 and MS-D1. An equal number of control arrays were also run side-by-side with the MS samples. Control array 1 included GCT-A4, A5 and A6; control array 2 included IBM-A1, A2 and A3 and control array 3 included IBM-B1, A2 and A3.

| MS array 1       | MS array 2       | MS array 3             | Control array 1      | Control array 2   | Control array 3   | Database ID    | Description                                                                               |
|------------------|------------------|------------------------|----------------------|-------------------|-------------------|----------------|-------------------------------------------------------------------------------------------|
| MS-derived rIgG  |                  |                        | Control-derived rIgG |                   |                   |                |                                                                                           |
| MS-A1, A4 and A6 | MS-C1, C2 and C4 | MS-F1, MS-B1 and MS-D1 | GCT-A4, A5 and A6    | IBM-A1, A2 and A3 | IBM-B1, A2 and A3 |                |                                                                                           |
| 18.72289         | -0.27933         | 0.14805                | -0.15959             | -0.22101          | -0.1595           | BC002859.1     | Zinc finger protein 434 (ZNF434)                                                          |
| 9.28843          | -0.26154         | -0.24613               | -0.12188             | -0.03497          | -0.05196          | NM_144582.1    | Protein TEX261                                                                            |
| 5.14139          | 1.04615          | 4.67008                | 1.69579              | 1.50156           | 1.59497           | BC064512.1     | Ubiquitin protein ligase E3 component n-recognin 2 (UBR2)                                 |
| 3.93412          | -0.14934         | -0.21126               | -0.10147             | 0.14758           | 0.03775           | BC021282.1     | Zinc finger protein 444                                                                   |
| 3.84769          | 0.39126          | -0.11347               | 0.93392              | 2.81065           | 0.51889           | NM_032138.2    | Kelch repeat and BTB (POZ) domain containing 7 (KBTBD7)                                   |
| 2.49117          | 9.29009          | 3.15964                | 0.76089              | 0.79793           | 1.01824           | NM_080664.1    | Chromosome 14 open reading frame 126 (C14orf126)                                          |
| 0.08156          | 5.52918          | 0.1927                 | 0.28658              | 0.42184           | 0.33986           | NM_012148.1    | Double homeobox, 3 (DUX3)                                                                 |
| 0.30002          | 4.47831          | 3.22296                | 0.07619              | 0.42166           | -0.0457           | NM_004766.1    | Coatomer protein complex, subunit beta 2 (beta prime) (COPB2)                             |
| 0.23197          | 3.7005           | -0.26932               | -0.05105             | 0.36803           | 0.09027           | NM_017871.3    | Cleavage and polyadenylation specific factor 3-like (CPSF3L)                              |
| 0.65573          | 3.62779          | 4.02304                | 0.02715              | 0.40577           | 0.58791           | NM_032403.1    | Protocadherin gamma subfamily C, 3 (PCDHGC3), transcript variant 3                        |
| 0.22647          | 3.21718          | 2.74065                | -0.06065             | -0.05855          | 0.03679           | NM_015138.2    | Rtf1, Paf1/RNA polymerase II complex component, homolog (S. cerevisiae) (RTF1)            |
| 2.07074          | 1.50829          | 6.98401                | 0.77787              | 1.00109           | 2.57242           | BC063390.1     | Hypothetical protein LOC51233, mRNA (cDNA clone MGC:75009 IMAGE:5170001), complete cds.   |
| 2.7561           | 0.96952          | 5.95064                | 0.62834              | 2.70619           | 0.60574           | BC010629.1     | Outer dense fiber of sperm tails 2 (ODF2)                                                 |
| 0.47418          | 2.29552          | 5.49717                | 0.11357              | 0.3455            | 0.47185           | NM_024038.2    | Chromosome 19 open reading frame 43 (C19orf43)                                            |
| 0.56177          | 2.57615          | 5.28546                | 0.03212              | 0.07246           | 0.79862           | BC040946.1     | CWC15 homolog (S. cerevisiae) (HSPC148)                                                   |
| 1.01722          | 1.25852          | 5.19654                | 0.06161              | 0.0742            | 1.6346            | BC033817.1     | PC4 and SFRS1 interacting protein 1 (PSIP1)                                               |
| 0.12629          | 0.33634          | 5.18646                | -0.02773             | -0.05489          | 0.46749           | BC007346.2     | Uncharacterized protein C16orf14                                                          |
| 1.03445          | 2.49141          | 5.11891                | 0.17941              | 0.27126           | 1.93482           | NM_024790.2    | Centrosome and spindle pole associated protein 1 (CSPP1), transcript variant 2            |
| 0.35112          | -0.00418         | 4.61786                | 0.05543              | 0.233             | 0.82309           | NM_206855.1    | Quaking homolog, KH domain RNA binding (mouse) (QKI), transcript variant 4                |
| 0.37979          | 1.94793          | 4.59748                | 0.39256              | 0.36401           | 0.34195           | BC002914.1     | WAS/WASL-interacting protein family member 1                                              |
| 0.46057          | -0.07768         | 4.49425                | 0.05389              | 0.23841           | 0.71821           | NM_175609.1    | ADP-ribosylation factor GTPase activating protein 1 (ARFGAP1), transcript variant 2       |
| 0.06707          | 0.17261          | 4.48135                | -0.1073              | 0.01918           | 0.20388           | BC066353.1     | LIM homeobox transcription factor 1, alpha (LMX1A)                                        |
| 0.55453          | -0.01256         | 4.47046                | 0.06213              | 0.30619           | 0.66681           | NM_017612.1    | Zinc finger CCHC domain-containing protein 8                                              |
| 1.15534          | 0.48698          | 4.4628                 | 0.13209              | 0.18495           | 0.78041           | BC058861.1     | Sulfotransferase family, cytosolic, 1C, member 4 (SULT1C4)                                |
| 1.46573          | 0.93892          | 4.23939                | 1.9374               | 1.53527           | 2.42601           | NM_014763.2    | Mitochondrial ribosomal protein L19 (MRPL19), nuclear gene encoding mitochondrial protein |
| -0.23435         | -0.32902         | 4.23314                | -0.18617             | -0.26433          | -0.20008          | NM_005659.1    | Ubiquitin fusion degradation 1 like (yeast) (UFD1L), transcript variant 1, mRNA.          |
| -0.09652         | 0.59499          | 4.18797                | -0.11552             | -0.11987          | -0.08894          | BC021670.1     | Ferritin, light polypeptide (FTL)                                                         |
| 0.6301           | 0.54478          | 4.14361                | 1.47612              | 0.81662           | 0.81228           | NM_006790.1    | Myotilin (MYOT)                                                                           |
| 0.09096          | 0.24061          | 4.05409                | 0.21989              | 0.11963           | 0.25887           | NM_032349.1    | Nudix (nucleoside diphosphate linked moiety X)-type motif 16-like 1 (NUDT16L1)            |
| -0.07669         | 0.0489           | 4.04481                | -0.05346             | 0.13237           | 0.01461           | BC093864.1     | Disks large homolog 3                                                                     |
| 0.28974          | 1.18816          | 3.99944                | 0.49579              | 0.43318           | 0.5919            | BC007363.1     | Branched chain ketoacid dehydrogenase kinase (BCKDK)                                      |
| 0.25977          | 1.01451          | 3.95669                | 0.1242               | 0.21728           | 1.02487           | XM_379498.2    | PREDICTED: Homo sapiens hypothetical LOC401363 (LOC401363)                                |
| 0.68627          | 0.20687          | 3.86878                | -0.00647             | 0.9831            | 0.21279           | BC091500.1     | Outer dense fiber protein 2                                                               |
| 0.00801          | 0.10017          | 3.76535                | -0.11089             | -0.06047          | 0.35882           | NM_001551.1    | Immunoglobulin (CD79A) binding protein 1 (IGBP1)                                          |
| 0.08402          | 0.69072          | 3.68127                | -0.09272             | -0.05278          | 0.23479           | NM_021178.1    | Cyclin B1 interacting protein 1 (CCNB1IP1), transcript variant 1                          |
| 0.43683          | 2.35463          | 3.6605                 | 0.37833              | 0.52926           | 1.02677           | BC020726.1     | Sciellin (SCEL)                                                                           |
| -0.10926         | 0.41951          | 3.5986                 | -0.10661             | 0.37606           | -0.04476          | NM_156036.1    | Homeobox protein Hox-B6                                                                   |
| 1.68869          | 0.47966          | 3.51412                | 0.48139              | 1.79311           | 1.01539           | BC005055.1     | Forkhead box P1 (FOXP1)                                                                   |
| 0.76532          | -0.04473         | 3.34313                | 0.05167              | 0.31335           | 1.14891           | BC007811.2     | Hypothetical protein FLJ22795 (FLJ22795)                                                  |
| 0.15959          | -0.02956         | 3.22558                | -0.08844             | -0.0437           | 0.20521           | NM_000190.2    | Hydroxymethylbilane synthase (HMBS), transcript variant 1                                 |
| 0.23733          | 0.17706          | 3.20118                | -0.02636             | 0.15666           | 0.68351           | BC010155.2     | Adrenodoxin-like protein, mitochondrial                                                   |
| 0.51501          | 1.51221          | 3.19493                | 0.09625              | 0.31615           | 0.75994           | NM_001009880.1 | Chromosome 22 open reading frame 9 (C22orf9), transcript variant 2                        |
| 0.90531          | 0.44017          | 3.12536                | 0.25006              | 0.68579           | 0.92664           | NM_001819.1    | Chromogranin B (secretogranin 1) (CHGB)                                                   |
