# Supplementary material for: Investigating the Antigen Specificity of Multiple Sclerosis Central Nervous System-Derived Immunoglobulins
Source: PubMed Central journal article supplement (PMC4663633; doi:10.3389/fimmu.2015.00600), 2015-11-25
Supplement: table_1.pdf [file table_1.pdf]

**Supplementary Table 1. Recombinant immunoglobulins used in this study**

| <b>Case</b> | <b>rIgG</b> | <b>Tissue source</b>   | <b>Tissue characteristics</b>  |
|-------------|-------------|------------------------|--------------------------------|
| MS-A        | MS-A1       | MS lesion              | White matter                   |
|             | MS-A2       | MS lesion              | White matter                   |
|             | MS-A3       | MS lesion              | White matter                   |
|             | MS-A4       | MS lesion              | White matter                   |
|             | MS-A5       | MS lesion              | White matter                   |
|             | MS-A6       | MS lesion              | White matter                   |
| MS-B        | MS-B1       | MS lesion              | White matter                   |
| MS-C        | MS-C1       | MS lesion              | White matter                   |
|             | MS-C2       | MS lesion              | White matter                   |
|             | MS-C3       | MS lesion              | White matter                   |
|             | MS-C4       | MS lesion              | White matter                   |
| MS-D        | MS-D1       | MS lesion              | White matter                   |
|             | MS-D2       | MS lesion              | White matter                   |
|             | MS-D3       | MS lesion              | White matter                   |
|             | MS-D4       | MS lesion              | White matter                   |
| MS-E        | MS-E1       | MS lesion              | White matter                   |
| MS-F        | MS-F1       | MS CNS meninges        | Meningeal follicle             |
| GCT-A       | GCT-A1      | Intracranial germinoma | tumor infiltrating lymphocytes |
|             | GCT-A2      | Intracranial germinoma | tumor infiltrating lymphocytes |
|             | GCT-A3      | Intracranial germinoma | tumor infiltrating lymphocytes |
|             | GCT-A4      | Intracranial germinoma | tumor infiltrating lymphocytes |
|             | GCT-A5      | Intracranial germinoma | tumor infiltrating lymphocytes |
|             | GCT-A6      | Intracranial germinoma | tumor infiltrating lymphocytes |
|             | GCT-A7      | Intracranial germinoma | tumor infiltrating lymphocytes |
|             | GCT-A8      | Intracranial germinoma | tumor infiltrating lymphocytes |
|             | GCT-A9      | Intracranial germinoma | tumor infiltrating lymphocytes |

|       |         |                        |                                |
|-------|---------|------------------------|--------------------------------|
|       | GCT-A10 | Intracranial germinoma | tumor infiltrating lymphocytes |
| IBM-A | IBM-A1  | IBM muscle tissue      | biopsy                         |
|       | IBM-A2  | IBM muscle tissue      | biopsy                         |
|       | IBM-A3  | IBM muscle tissue      | biopsy                         |
| IBM-B | IBM-B1  | IBM muscle tissue      | biopsy                         |
|       | IBM-B2  | IBM muscle tissue      | biopsy                         |
|       | IBM-B3  | IBM muscle tissue      | biopsy                         |
| mAb   | h8-18C5 | humanized Anti-MOG mAb | Humanized 8-18C5               |
