# Supplementary material for: Investigating the Antigen Specificity of Multiple Sclerosis Central Nervous System-Derived Immunoglobulins
Source: PubMed Central journal article supplement (PMC4663633; doi:10.3389/fimmu.2015.00600), 2015-11-25
Supplement: table_2.pdf [file table_2.pdf]

**Supplementary Table 2. Sequence characteristics of immunoglobulin variable regions used in this study**

| ID    | HEAVY    |          |       |                                                                                                                                                  |                  | LIGHT     |       |                                                          |                  |
|-------|----------|----------|-------|--------------------------------------------------------------------------------------------------------------------------------------------------|------------------|-----------|-------|----------------------------------------------------------|------------------|
|       | VH       | D        | JH    | CDR3* (aa)                                                                                                                                       | Mutations** (aa) | Vk        | Jk    | CDR3* (aa)                                               | Mutations** (aa) |
| MS-A1 | IGHV3-15 | IGHD5-12 | IGHJ4 | CTTDD <b>T</b> GH <b>D</b> WGHW                                                                                                                  | 7                | IGKV1-12  | IGKJ1 | CQQAN <b>S</b> FPSF                                      | 3                |
| MS-A2 | IGHV4-59 | IGHD1-26 | IGHJ5 | CARG <b>K</b> D <b>W</b> L <b>D</b> P <b>W</b>                                                                                                   | 8                | IGKV1-9   | IGKJ2 | CQQ <b>V</b> N <b>A</b> YPYTF                            | 3                |
| MS-A3 | IGHV6-1  | IGHD6-6  | IGHJ4 | C <b>A</b> TGGQ <b>Y</b> T <b>S</b> W <b>S</b> F <b>D</b> S <b>W</b>                                                                             | 9                | IGKV1-16  | IGKJ4 | CQQ <b>Y</b> H <b>N</b> LLTF                             | 8                |
| MS-A4 | IGHV3-30 | IGHD2-2  | IGHJ4 | C <b>A</b> K <b>E</b> I <b>D</b> L <b>A</b> Y <b>L</b> N <b>S</b> W                                                                              | 6                | IGKV1-9   | IGKJ2 | CQQ <b>V</b> N <b>A</b> YPYTF                            | 3                |
| MS-A5 | IGHV3-30 | IGHD2-2  | IGHJ4 | C <b>A</b> K <b>E</b> I <b>D</b> L <b>A</b> Y <b>L</b> N <b>S</b> W                                                                              | 7                | IGKV1-9   | IGKJ2 | CQQ <b>V</b> N <b>A</b> YPYTF                            | 3                |
| MS-A6 | IGHV1-18 | IGHD3-10 | IGHJ4 | C <b>V</b> R <b>G</b> V <b>V</b> A <b>G</b> D <b>D</b> Y <b>W</b>                                                                                | 9                | IGKV1-9   | IGKJ2 | CQQ <b>V</b> N <b>A</b> YPYTF                            | 3                |
| MS-B1 | IGHV2-26 | IGHD3-22 | IGHJ6 | C <b>A</b> R <b>L</b> H <b>P</b> V <b>A</b> Y <b>E</b> G <b>Y</b> <b>Y</b> H <b>H</b> V <b>H</b> G <b>V</b> D <b>V</b> W                         | 7                | IGKV1-39  | IGKJ5 | C <b>L</b> Q <b>S</b> Y <b>N</b> T <b>P</b> L <b>T</b> F | 5                |
| MS-C1 | IGHV3-9  | IGHD5-12 | IGHJ4 | C <b>A</b> R <b>D</b> S <b>G</b> Y <b>E</b> F <b>L</b> D <b>Y</b> W                                                                              | 12               | IGKV1-33  | IGKJ4 | CQQ <b>Y</b> D <b>N</b> L <b>R</b> P <b>L</b> T <b>F</b> | 3                |
| MS-C2 | IGHV2-5  | IGHD1-26 | IGHJ6 | C <b>A</b> H <b>T</b> R <b>I</b> V <b>G</b> A <b>T</b> R <b>H</b> S <b>Y</b> Y <b>H</b> A <b>M</b> D <b>V</b> W                                  | 9                | IGKV1-39  | IGKJ1 | CQQ <b>S</b> Y <b>T</b> F <b>S</b> W <b>T</b> F          | 8                |
| MS-C3 | IGHV2-5  | IGHD2-2  | IGHJ4 | C <b>A</b> H <b>V</b> F <b>R</b> D <b>C</b> S <b>T</b> <b>T</b> R <b>C</b> Y <b>D</b> R <b>G</b> Y <b>D</b> Y <b>W</b>                           | 8                | IGKV1-33  | IGKJ4 | CQ <b>H</b> Y <b>D</b> S <b>L</b> P <b>L</b> T <b>F</b>  | 9                |
| MS-C4 | IGHV1-2  | IGHD6-25 | IGHJ3 | C <b>A</b> R <b>D</b> G <b>G</b> R <b>H</b> T <b>S</b> G <b>Y</b> Y <b>E</b> W <b>T</b> A <b>L</b> D <b>I</b> W                                  | 10               | IGKV1-39  | IGKJ1 | CQQ <b>S</b> Y <b>T</b> F <b>S</b> W <b>T</b> F          | 8                |
| MS-D1 | IGHV1-46 | IGHD5-18 | IGHJ3 | C <b>T</b> T <b>E</b> L <b>G</b> Y <b>S</b> L <b>G</b> L <b>R</b> A <b>S</b> D <b>V</b> W                                                        | 8                | IGKV3-11  | IGKJ2 | C <b>H</b> L <b>R</b> G <b>N</b> W <b>P</b> R <b>T</b> F | 5                |
| MS-D2 | IGHV1-46 | IGHD5-18 | IGHJ3 | C <b>T</b> T <b>E</b> L <b>G</b> Y <b>S</b> L <b>G</b> L <b>R</b> A <b>S</b> D <b>V</b> W                                                        | 8                | IGKV1-39  | IGKJ2 | CQQ <b>S</b> D <b>S</b> P <b>Y</b> T <b>F</b>            | 6                |
| MS-D3 | IGHV3-7  | IGHD2-2  | IGHJ6 | C <b>A</b> R <b>E</b> V <b>R</b> D <b>C</b> S <b>S</b> T <b>C</b> Y <b>A</b> E <b>D</b> L <b>I</b> Y <b>F</b> Y <b>Y</b> Y <b>M</b> D <b>V</b> W | 9                | IGKV3-11  | IGKJ2 | C <b>H</b> L <b>R</b> G <b>N</b> W <b>P</b> R <b>T</b> F | 5                |
| MS-D4 | IGHV5-51 | IGHD5-12 | IGHJ6 | C <b>A</b> R <b>H</b> S <b>P</b> P <b>G</b> Y <b>D</b> Y <b>N</b> A <b>M</b> D <b>V</b> W                                                        | 6                | IGHKV3-11 | IGKJ2 | C <b>H</b> L <b>R</b> G <b>N</b> W <b>P</b> R <b>T</b> F | 5                |
| MS-E1 | IGHV2-5  | IGHD1-14 | IGHJ4 | C <b>A</b> H <b>R</b> P <b>I</b> E <b>H</b> N <b>R</b> I <b>P</b> F <b>D</b> F <b>W</b>                                                          | 4                | IGKV1-39  | IGKJ1 | CQQ <b>S</b> Y <b>S</b> T <b>L</b> W <b>T</b> F          | 4                |

|         |          |          |       |                                                              |    |          |       |                       |    |
|---------|----------|----------|-------|--------------------------------------------------------------|----|----------|-------|-----------------------|----|
| MS-F1   | IGHV3-23 | IGHD3-16 | IGHJ6 | CANARFY <b>C</b> STSNCPAAGMDVW                               | 11 | IGKV2-28 | IGKJ4 | CMQ <b>S</b> LQTPPTF  | 6  |
|         |          |          |       |                                                              |    |          |       |                       |    |
| GCT-A1  | IGHV4-61 | IGHD3-22 | IGHJ3 | CARDLLYY <b>S</b> DSSG <b>F</b> YGAFDIW                      | 3  | IGKV4-1  | IGKJ1 | CQQYY <b>T</b> TLGTF  | 1  |
| GCT-A2  | IGHV3-43 | IGHD2-8  | IGHJ4 | CAKSSRDI <b>L</b> LGTTGFMD <b>V</b> W                        | 4  | IGKV1-33 | IGKJ4 | CQQYDNL <b>P</b> PTF  | 3  |
| GCT-A3  | IGHV4-61 | IGHD2-2  | IGHJ3 | CARGLVTY <b>C</b> RT <b>N</b> CYD <b>V</b> FDIW              | 5  | IGKV1-12 | IGKJ2 | CQQANS <b>F</b> PYTF  | 5  |
| GCT-A4  | IGHV3-7  | IGHD6-19 | IGHJ6 | CARWAHSPVAESFHYYYY <b>A</b> MDVW                             | 2  | IGKV3-20 | IGKJ2 | CQQY <b>G</b> NSPPYTF | 6  |
| GCT-A5  | IGHV5-10 | NI       | IGHJ6 | CARDY <b>G</b> DVW                                           | 9  | IGKV4-1  | IGKJ1 | CQQYY <b>T</b> IPRTF  | 2  |
| GCT-A6  | IGHV3-33 | IGHD3-3  | IGHJ4 | CARDSTPFNYDFWSGYYSVPPPTATADYW                                | 2  | IGKV1-33 | IGKJ5 | CQQY <b>G</b> DLPRAF  | 5  |
| GCT-A7  | IGHV5-51 | IGHD3-22 | IGHJ4 | CARPS <b>S</b> MMSPFDYW                                      | 6  | IGKV1-33 | IGKJ5 | CQQY <b>G</b> DLPRAF  | 4  |
| GCT-A8  | IGHV5-10 | IGHD2-2  | IGHJ4 | CARHDGAAMARY <b>G</b> YW                                     | 4  | IGKV2-30 | IGKJ1 | CMQGT <b>Q</b> WPWTF  | 4  |
| GCT-A9  | IGHV1-24 | IGHD3-22 | IGHJ5 | CATASRDYYDSSGYLSTKNWFDPW                                     | 0  | IGKV1-33 | IGKJ4 | CQQYD <b>D</b> LPLTF  | 3  |
| GCT-A10 | IGHV4-61 | IGHD3-22 | IGHJ3 | CARDLVYY <b>S</b> DSSG <b>F</b> YGAFDIW                      | 4  | IGKV4-1  | IGKJ1 | CQQYY <b>T</b> TLGTF  | 1  |
|         |          |          |       |                                                              |    |          |       |                       |    |
| IBM-A1  | IGHV3-9  | IGHD3-22 | IGHJ4 | <b>C</b> V <b>K</b> EDY <b>G</b> T <b>G</b> GYRFD <b>H</b> W | 10 | IGKV1-39 | IGKJ2 | CQQSY <b>T</b> SPYTF  | 5  |
| IBM-A2  | IGHV2-70 | IGHD3-10 | IGHJ6 | CARVRVVRGAGYYYGMDVW                                          | 11 | IGKV4-1  | IGKJ4 | CQQYY <b>D</b> TPLTF  | 11 |
| IBM-A3  | IGHV5-51 | IGHD3-3  | IGHJ6 | CARLKY <b>H</b> FW <b>N</b> GHDYYYYGMDVW                     | 13 | IGKV4-1  | IGKJ2 | CQQYY <b>S</b> PPYTF  | 4  |
| IBM-B1  | IGHV1-69 | IGHD1-26 | IGHJ1 | CE <b>G</b> GFQHW                                            | 27 | IGKV2-28 | IGKJ2 | CMQAR <b>R</b> QTVYTF | 8  |
| IBM-B2  | IGHV3-9  | IGHD3-10 | IGHJ4 | <b>C</b> V <b>K</b> DRGYA <b>S</b> LSFGDLE <b>Y</b> W        | 5  | IGKV3-15 | IGKJ4 | CQQY <b>D</b> NWPSF   | 7  |
| IBM-B3  | IGHV1-2  | IGHD3-3  | IGHJ4 | CASLR <b>I</b> K <b>I</b> FG <b>L</b> I <b>N</b> PYDYW       | 12 | IGKV3-20 | IGKJ5 | CQQY <b>A</b> NSVF    | 7  |
|         |          |          |       |                                                              |    |          |       |                       |    |
| H8-18C5 | IGHV1-18 | IGHD4-23 | IGHJ1 | CATGNTMVNMPYW                                                | 10 | IGKV4-1  | IGKJ4 | CQNDHSYPLTF           | 1  |

\* Bold amino acids indicate replacement mutations

\*\*  $V_H$  and  $V_K$  gene segment mutation count does not include those indicated in the CDR3

The sequences of the  $V_H$  and  $V_L$  domains listed in the table have been deposited in GenBank under accession numbers KT984419-KT984484 following the same order in which they appear in the table.

NI = not identifiable (usually due to particularly short D-segments)
