# Supplementary material for: Investigating the Antigen Specificity of Multiple Sclerosis Central Nervous System-Derived Immunoglobulins
Source: PubMed Central journal article supplement (PMC4663633; doi:10.3389/fimmu.2015.00600), 2015-11-25
Supplement: table_3.pdf [file table_3.pdf]

**Supplemental Table 3. Plotted values of MS and control-derived rIgG binding to neurofilament light (NF-L) by solid phase ELISA shown in Figure 1.**

| <b>Identification of rIgG</b> | <b><math>\Delta</math>Abs (455nm)</b> |
|-------------------------------|---------------------------------------|
| MS-A1                         | 0.229                                 |
| MS-D2                         | 0.412                                 |
| MS-A2                         | 0.384                                 |
| MS-A6                         | 0.245                                 |
| MS-A4                         | 0.619                                 |
| MS-A5                         | 0.322                                 |
| MS-B1                         | 0.881                                 |
| MS-F1                         | 0.309                                 |
| MS-C1                         | 0.472                                 |
| MS-C2                         | 1.139                                 |
| MS-C4                         | 0.964                                 |
| MS-C3                         | 0.176                                 |
| MS-D1                         | 0.455                                 |
| GCT-A8                        | 0.050                                 |
| GCT-A1                        | 0.000                                 |
| GCT-A10                       | 0.226                                 |
| GCT-A9                        | 0.101                                 |
| GCT-A3                        | 0.000                                 |
| GCT-A2                        | 0.154                                 |
| GCT-A5                        | 0.000                                 |
| GCT-A6                        | 0.879                                 |
