# Supplementary material for: Investigating the Antigen Specificity of Multiple Sclerosis Central Nervous System-Derived Immunoglobulins
Source: PubMed Central journal article supplement (PMC4663633; doi:10.3389/fimmu.2015.00600), 2015-11-25
Supplement: table_4.pdf [file table_4.pdf]

**Supplemental Table 4. Plotted values of MS and control-derived rIgG binding to protocadherin gamma by solid phase ELISA shown in Figure 3.**

| <b>Identification of rIgG</b> | <b>Abs (455nm)</b> |
|-------------------------------|--------------------|
| MS-A1                         | 0.207              |
| MS-D2                         | 0.036              |
| MS-A2                         | 0.072              |
| MS-A6                         | 0.010              |
| MS-A4                         | 0.040              |
| MS-A5                         | 0.045              |
| MS-B1                         | 0.135              |
| MS-F1                         | 0.048              |
| MS-C2                         | 0.710              |
| MS-C3                         | 0.019              |
| MS-D1                         | 0.186              |
| IBM-A2                        | 0.121              |
| IBM-A3                        | 0.032              |
| IBM-A1                        | 0.001              |
| GCT-A10                       | 1.161              |
| GCT-A9                        | 0.000              |
| GCT-A5                        | 0.016              |
| GCT-A6                        | 0.069              |
| GCT-A2                        | 0.046              |
| GCT-A1                        | 0.021              |
| GCT-A3                        | 0.093              |
| Commercial anti-protocadherin | 1.078              |
